# Supplementary material for: A full Stokes subgrid model for simulation of grounding line migration in ice sheets using Elmer/ICE(v8.3)
Source: Copernicus journal article supplement (doi:10.5194/gmd-2019-244), 2019-09-16
Supplement: Supplementary file [file gmd-2019-244-AC1-supplement.pdf]

# A full Stokes subgrid ~~model~~ scheme for simulation of grounding line migration in ice sheets using Elmer/ICE (v8.3)

Gong Cheng<sup>1</sup>, Per Lötstedt<sup>1</sup>, and Lina von Sydow<sup>1</sup>

<sup>1</sup>Department of Information Technology, Uppsala University, P. O. Box 337, SE-75105 Uppsala, Sweden

**Correspondence:** Gong Cheng (cheng.gong@it.uu.se)

**Abstract.** The full Stokes equations are solved by a finite element method for simulation of large ice sheets and glaciers. The simulation is particularly sensitive to the discretization of the grounding line which separates the ice resting on the bedrock and the ice floating on water and is moving in time. The boundary conditions at the ice base are enforced by Nitsche's method and a subgrid treatment of the ~~elements~~ element in the discretization ~~close to~~ with the grounding line. Simulations with the method in two dimensions for an advancing and a retreating grounding line illustrate the performance of the method. It is implemented in the two dimensional version of the open source code Elmer/ICE.

## 1 Introduction

Simulation with ice sheet models is a tool to assess the future sea-level rise (SLR) due to melting of continental ice sheets and glaciers ~~Hanna et al. (2013)~~ (Hanna et al., 2013) and to reconstruct the ice sheets of the past ~~DeConto and Pollard (2016); Stokes et al. (2011)~~ comparison with measurements and validation of the models. In the models, the predictions are particularly sensitive to the numerical treatment of the grounding line (GL) ~~Durand and Pattyn (2015)~~ (Durand and Pattyn, 2015). The GL is the line where the ice sheet leaves the solid bedrock and becomes an ice shelf floating on water driven by buoyancy. It is important to know the GL position to be able to quantify the ice discharge into the sea and as an indicator ~~if the ice sheet is advancing or retreating~~ Konrad et al. (2018) of ice sheet advances or retreats (Konrad et al., 2018). The distance that the GL moves may be long over palaeo time scales. It is shown in ~~Kingslake et al. (2018)~~ (Kingslake et al., 2018) that the GL has retreated several hundred km ~~on in~~ West Antarctica during the last 11,500 years and then advanced again after the isostatic rebound of the bed. The sensitivity, long time intervals, and long distances require a careful treatment of the GL neighborhood by the numerical method to discretize the model equations.

~~The most accurate ice model is based on the full Stokes (FS) equations. A simplification of the FS equations by integrating in the depth of the ice is the shallow shelf (or shelfy stream) approximation (SSA) MacAyeal (1989). The computational advantage with SSA is that the dimension of the problem is reduced by one. It is often used for simulation of the interaction between a grounded ice sheet and a marine ice shelf. Several other simplifications exist with the same advantages as the SSA but with slightly different solutions. Another simplification is the shallow ice approximation (SIA) suitable for ice sheets where vertical shear stresses determine the ice flow Weis et al. (1999).~~

25 When the ice rests on the ground and is affected by frictional forces on the bed, the ice flow is dominated by vertical shear stresses. ~~Longitudinal stresses are dominant when the ice is~~ The longitudinal stress gradient controls the flow of the ice floating on water. The GL is in the transition zone between these two types of flow with a gradual change of the stress field. ~~A SSA model for a two-dimensional (2D) ice is analyzed in Schoof (2007) where there is a switch in the friction coefficient at the GL from being positive in the grounded ice to zero in the floating ice. The stability of steady state GL solutions depends on the~~  
30 ~~geometry of the slope, see Schoof (2007)~~

The most accurate ice model in theory is based on the full Stokes (FS) equations. A simplification of the FS equations by integrating in the depth of the ice is the shallow shelf (or shelfy stream) approximation (SSA) (MacAyeal, 1989). It is stable in a downward slope and unstable in an upward slope, often used for simulation of the interaction between a grounded ice sheet and a marine ice shelf. In the zone between the grounded ice and the floating ice, it is necessary to use the FS equations ~~Doequier et al. (2011); Schoof (2011); Schoof and Hindmarsh (2010); Wilchinsky and Chugunov (2000) (Docquier et al., 2011; Sch~~  
35 ~~the ice is moving rapidly on the ground with low basal friction and the SSA equations are accurate both upstream and downstream of the GL. The solution to the linearized FS equations close to the GL is investigated using perturbation theory in Schoof (2011). The effect of perturbations in the topography and the friction coefficient on the surface velocity and height is studied in Cheng and Lötstedt (2019). The sensitivity to the perturbations increases close to the GL because the velocity of the ice increases and the thickness decreases there. (Schoof, 2011).~~  
40 ~~(Schoof, 2011).~~

The evolution of the GL in simulations is sensitive to the ice model, the basal friction model, and numerical parameters. In a major effort MISMIP ~~Pattyn et al. (2013, 2012) (Pattyn et al., 2013, 2012)~~, different ice models and implementations solve the same ice flow problems and the predicted GL steady state and transient GL motion are compared. The results depend on the model equations and the mesh resolution ~~Pattyn et al. (2013) (Pattyn et al., 2013)~~. The prediction of the GL and the SLR is  
45 different for different ice equations such as FS and SSA also in ~~Pattyn and Durand (2013) (Pattyn and Durand, 2013)~~. Including equations with vertical shear stress at the GL such as the FS equations seems to be crucial. The flotation condition determines where the GL is in SSA in (Docquier et al., 2011; Drouet et al., 2013). It is based on Archimedes' principle for an ice column immersed in water. The friction laws at the ice base depend on the effective pressure, the basal velocity, and the distance to the GL in different combinations in ~~Brondeux et al. (2017); Gagliardini et al. (2015); Gladstone et al. (2017); Leguy et al. (2014) (Brondeux et al.~~  
50 ~~The GL position and the SLR vary considerably depending on the choice of friction model. Given the friction model, the results are sensitive to its model parameters too Gong et al. (2017) (Gong et al., 2017).~~

Parameters in the numerical methods also influence the GL migration. It is observed in ~~Durand et al. (2009b) (Durand et al., 2009b)~~ that the mesh resolution along the ice bed has to be fine to obtain reliable solutions with FS in GL simulations. The GL is then located in a node of the fixed mesh. A mesh size below 1 km is necessary in ~~Larour et al. (2019) (Larour et al., 2019)~~ to re-  
55 solve the features at the GL. ~~The SIA and SSA equations model the ice close to the GL in Doequier et al. (2011). The transient response of the GL is compared with the FS equations and adaptive meshes in 2D and the SSA equations in Drouet et al. (2013). The flotation condition determines where the GL is in Docquier et al. (2011); Drouet et al. (2013). It is based on Archimedes' principle for an ice column immersed in water. Another adaptive mesh method is developed for the SSA equations in 1D in Gladstone et al. (2010a). The accuracy of the method is evaluated in simulations of the GL migration. Adaptive meshes for a fi-~~

60 nite volume discretization of an approximation of the FS equations are employed in [Cornford et al. \(2013\)](#) ([Cornford et al., 2013](#)) to study the GL retreat and loss of ice in West Antarctica. The FS solutions of benchmark problems in [Pattyn et al. \(2013\)](#) ~~computed by FEM implementations~~ ([Pattyn et al., 2013](#)) ~~computed by an implementation of the finite element method (FEM)~~ in Elmer/ICE [Gagliardini](#) FELIX-S [Leng et al. \(2012\)](#) ([Leng et al., 2012](#)) are compared in [Zhang et al. \(2017\)](#) ([Zhang et al., 2017](#)). The differences between the codes are attributed to different treatment of a friction parameter at the GL and different assignment of grounded and  
65 floating nodes and element faces.

A subgrid ~~model~~ [scheme](#) introduces an inner structure in the discretization element or mesh volume where the GL is [located](#). Such a model for the GL is tested in [Gladstone et al. \(2010b\)](#) ([Gladstone et al., 2010b](#)) for the 1D SSA equation where the flotation condition for the ice defines the position of the GL. The GL migration is determined by the 2D SSA equations discretized by the finite element method (FEM) in [Seroussi et al. \(2014\)](#) ([Seroussi et al., 2014](#)). Subgrid models at the GL are  
70 compared to a model without an internal structure in the element. The conclusion is that sub-element parameterization is necessary. A shallow approximation to FS with ~~subgrid modeling~~ [a subgrid scheme](#) on coarse meshes is compared to FS in [Feldmann et al. \(2014\)](#) ([Feldmann et al., 2014](#)) with similar results for the GL migration. Subgrid modeling and adaptivity are compared in [Cornford et al. \(2016\)](#) ([Cornford et al., 2016](#)) for a vertically integrated model. ~~The stability of the GL in solutions with FS and fine meshes in 2D are compared in Durand et al. (2009a) to the theory in Schoof (2007) with good agreement.~~ A fine mesh resolution is necessary for converged GL positions with FS in [Durand et al. \(2009a, b\)](#) ([Durand et al., 2009a, b](#)).  
75 ~~The purpose of a subgrid model~~ [scheme](#) is to avoid such fine meshes.

The fine mesh resolution needed in GL simulations with the FS equations would require large computational efforts in 3D ~~to solve the equations~~ in long time intervals. Since the GL moves long distances in palaeo simulations, a dynamic mesh refinement and coarsening of the mesh following the GL is necessary. The alternative pursued here [with FEM](#) is to introduce a subgrid  
80 ~~modeling with FEM~~ [scheme](#) in the mesh elements where the GL is located and keep the mesh size coarser. The subgrid ~~model~~ [scheme](#) is restricted to one element in a 2D [vertical](#) ice and is therefore computationally inexpensive. In an extension to 3D, the subgrid ~~model~~ [scheme](#) would be applied along a ~~1D~~ line of elements in 3D. The results with numerical modeling will always depend on the mesh resolution but can be more or less sensitive to the mesh spacing and time steps. Our subgrid ~~modeling~~ [scheme](#) is aiming at improving the accuracy in GL simulations for a static mesh ~~size~~.

85 We solve the FS equations in [a 2D vertical ice](#) with the Galerkin method implemented in Elmer/ICE [Gagliardini et al. \(2013\)](#) ([Gagliardini](#) [A subgrid discretization is proposed and tested for the element where the GL is located](#)). The boundary conditions are imposed by Nitsche's method [at the ice base](#) in the weak formulation of the equations [Nitsche \(1971\)](#); [Reusken et al. \(2017\)](#); [Urquiza et al. \(2014\)](#) ([N](#)). The linear Stokes equations are solved in [Chouly et al. \(2017a\)](#) ([Chouly et al., 2017a](#)) with Nitsche's treatment of the boundary conditions. They solve the equations for the displacement but here we solve for the velocity using similar numerical techniques  
90 to weakly impose the Dirichlet boundary conditions ~~A subgrid discretization is proposed and tested for the element where the GL is located on the normal velocity at the base. The frictional force in the tangential direction is applied on part of the element with the GL.~~ The position of the GL within the element is determined ~~by~~ [in agreement with](#) theory developed for the linearized FS in [Schoof \(2011\)](#) ([Schoof, 2011](#)).

The paper is organized as follows. Section 2 is devoted to the presentation of the mathematical model of the ice sheet dynamics. In Sect. 3, the numerical discretization ~~is presented with FEM is given~~ while the subgrid ~~modeling scheme~~ around the GL is found in Sect. 4. ~~We present the numerical results.~~ The numerical results for a MISMP problem are presented in Sect. 5. The extension to 3D is discussed in Sect. 6 and finally some conclusions are drawn in Sect. 7.

## 2 Ice model

### 2.1 The full Stokes (FS) equations

100 We use the FS equations in a 2D vertical ice with coordinates  $\mathbf{x} = (x, z)^T$  for modeling of the flow of an ice sheet ~~Hutter (1983)~~ (Hutter, 1983). These nonlinear partial differential equations (PDEs) in the interior of the ice domain  $\Omega$  are given by

$$\begin{cases} \nabla \cdot \mathbf{u} = 0, \\ -\nabla \cdot \boldsymbol{\sigma} = \rho \mathbf{g}, \end{cases} \quad (1)$$

where the stress tensor is  ~~$\boldsymbol{\sigma} = 2\eta(\mathbf{u})\boldsymbol{\tau}(\mathbf{u}) - p\mathbb{I}$~~ . ~~The symmetric~~  $\boldsymbol{\sigma} = \boldsymbol{\tau}(\mathbf{u}) - p\mathbb{I}$  and the deviatoric stress tensor is  $\boldsymbol{\tau}(\mathbf{u}) = 2\eta(\mathbf{u})\dot{\boldsymbol{\epsilon}}(\mathbf{u})$ . The strain rate tensor is defined by

$$105 \quad \dot{\boldsymbol{\epsilon}}(\mathbf{u}) = \frac{1}{2}(\nabla \mathbf{u} + \nabla \mathbf{u}^T) = \begin{pmatrix} \dot{\epsilon}_{11} & \dot{\epsilon}_{12} \\ \dot{\epsilon}_{12} & \dot{\epsilon}_{22} \end{pmatrix}, \quad (2)$$

$\mathbb{I}$  is the identity matrix, and the viscosity is defined by Glen's flow law

$$\eta(\mathbf{u}) = \frac{1}{2} (\mathcal{A}(T')) \underline{\underline{\frac{-1}{n} - \frac{1}{n} \dot{\epsilon}^{\frac{1-n}{n}}}}, \quad \dot{\epsilon}_e = \sqrt{\frac{1}{2} \text{tr}(\boldsymbol{\tau}(\mathbf{u})\boldsymbol{\tau}(\mathbf{u}))} \sqrt{\frac{1}{2} \text{tr}(\dot{\boldsymbol{\epsilon}}(\mathbf{u})\dot{\boldsymbol{\epsilon}}(\mathbf{u}))}. \quad (3)$$

Here  $\mathbf{u} = (u, w)^T$  is the vector of velocities,  $\rho$  is the density of the ice,  $p$  denotes the pressure, and the gravitational acceleration in the  $z$ -direction is denoted by  $\mathbf{g}$ . The rate factor  $\mathcal{A}(T')$  describes how the viscosity depends on the pressure melting point corrected temperature  $T'$ . For isothermal flow assumed here, the rate factor  $\mathcal{A}$  is constant. Finally,  $n$  is usually taken to be 3.

### 2.2 Boundary conditions

At the boundary  $\Gamma$  of the ice domain  $\Omega$  we define the normal outgoing vector  $\mathbf{n}$  and tangential vector  $\mathbf{t}$ , see ~~Figure~~ Fig. 1. In a the 2D vertical case considered here,  $y$  the ice sheet geometry is constant in ~~the figure.~~ The upper boundary  $y$ . The ice surface is denoted by  $\Gamma_s$  and the ~~lower boundary is  $\Gamma_b$~~  ice base is  $\Gamma_b = \Gamma_{bg} \cup \Gamma_{bf}$ . At  $\Gamma_s$  and  $\Gamma_{bf}$ , the floating part of  $\Gamma_b$ , we have that

$$\underline{\underline{\boldsymbol{\sigma} = \mathbf{f}_s}}. \quad \boldsymbol{\sigma} \mathbf{n} = \mathbf{f}_s \quad , \quad \boldsymbol{\sigma} \mathbf{n} = \mathbf{f}_{bf} \quad (4)$$

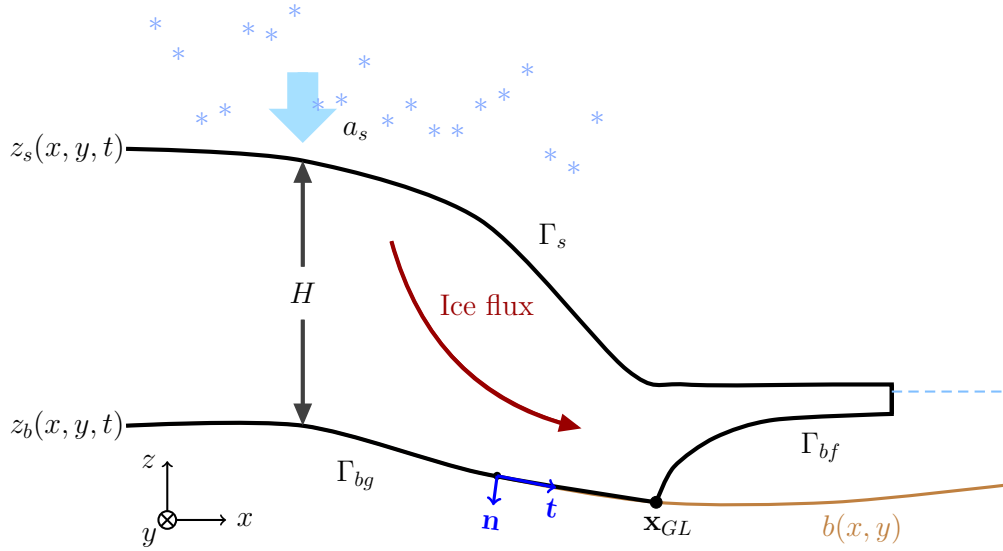

**Figure 1.** A two dimensional schematic view of a marine ice sheet.

respectively. The ice is stress-free at  $\Gamma_s$ ,  $\mathbf{f}_s = 0$ , and  $\mathbf{f}_s = -p_w \mathbf{n}$ ,  $\mathbf{f}_{bf} = -p_w \mathbf{n}$  at the ice/ocean interface  $\Gamma_{bf}$  where  $p_w$  is the water pressure. Let

$$120 \quad \sigma_{nt} = \mathbf{t} \cdot \sigma \mathbf{n}, \quad \sigma_{nn} = \mathbf{n} \cdot \sigma \mathbf{n}, \quad u_t = \mathbf{t} \cdot \mathbf{u},$$

where  $\sigma_{nn}$  and  $\sigma_{nt}$  are the normal and tangential components of the stress and  $u_t$  is the tangential component of the ice velocity at the ice base. Then for the slip boundary  $\Gamma_{bg}$ , the grounded part of  $\Gamma_b$  where the ice is grounded on the bedrock, we have a friction law for the sliding ice

$$\sigma_{nt} + \beta(\mathbf{u}, \mathbf{x})u_t = 0, \quad u_n = \mathbf{n} \cdot \mathbf{u} = 0, \quad -\sigma_{nn} \geq p_w, \quad (5)$$

125 where  $u_n$  is the normal component of the ice velocity. The type of friction law is determined by the friction coefficient  $\beta$ . There At  $\Gamma_{bf}$ , there is a balance between  $\sigma_{nn}$  and  $p_w$  at  $\Gamma_{bf}$  and the contact is friction-free,  $\beta = 0$ , then

$$\sigma_{nt} = 0, \quad -\sigma_{nn} = p_w. \quad (6)$$

The GL is located where. At the GL, the boundary condition switches from  $\beta > 0$  and  $u_n = 0$  on  $\Gamma_{bg}$  to  $\beta = 0$  and a free  $u_n$  on  $\Gamma_{bf}$ . In 2D vertical ice, the GL is the point  $(x_{GL}, z_{GL})$  between  $\Gamma_{bg}$  and  $\Gamma_{bf}$ .

130 With the ocean surface. The ocean surface is at  $z = 0$ , and  $p_w = -\rho_w g z_b$  where  $\rho_w$  is the density of sea water,  $z_b$  is the  $z$ -coordinate of  $\Gamma_b$ , and  $g$  is the gravitational constant gravitational acceleration.

### 2.3 The free surface equations

The boundaries  $\Gamma_s$  and  $\Gamma_b$  are time-dependent and move according to two free surface equations. The boundary  $\Gamma_{bg}$  follows the fixed bedrock with coordinates  $(x, b(x))$ .

135 The  $z$ -coordinate of the [free-surface-ice surface](#) position  $z_s(x, t)$  at  $\Gamma_s$  (see Fig. 1) is the solution of an advection equation

$$\frac{\partial z_s}{\partial t} + u_s \frac{\partial z_s}{\partial x} - w_s = a_s, \quad (7)$$

where  $a_s$  denotes the [net-surface-accumulation/ablation-of-ice-surface-mass-balance](#) and  $\mathbf{u}_s = (u_s, w_s)^T$  the velocity at the [free-surface-ice surface](#) in contact with the atmosphere. Similarly, the  $z$ -coordinate for the [lower-surface-ice base](#)  $z_b$  of the floating ice at  $\Gamma_{bf}$  satisfies

$$140 \quad \frac{\partial z_b}{\partial t} + u_b \frac{\partial z_b}{\partial x} - w_b = a_b, \quad (8)$$

where  $a_b$  is the [net-accumulation/ablation-at-the-lower-surface-basal-mass-balance](#) and  $\mathbf{u}_b = (u_b, w_b)^T$  the velocity of the ice at  $\Gamma_{bf}$ . On  $\Gamma_{bg}$ ,  $z_b = b(x)$  [and on  \$\Gamma\_{bf}\$ ,  \$z\_b < 0\$](#) .

The thickness of the ice is denoted by  $H = z_s - z_b$  and depends on [\(x, t\)](#)  $x$  and  $t$ .

## 2.4 The solution close to the grounding line

145 The 2D [vertical](#) solution of the FS equations in Eq. (1) with a constant viscosity,  $n = 1$  in Eq. (3), is expanded in small parameters in [Schoof \(2011\)](#) ([Schoof, 2011](#)). The solutions in different regions around the GL are connected by matched asymptotics. Upstream of the GL at the [bedrock-grounded part](#),  $x < x_{GL}$ , the leading terms in the expansion satisfy a simple [equation-relation](#) in scaled variables close to the GL. Across the GL,  $u$ , the flux of ice  $uH$ , and the depth integrated normal or longitudinal stress  $\tau_{11}$  in Eq. (2) are continuous. By [adding-including](#) higher order terms [in the expansion in small parameters](#), it is shown that the

150 [upper-surface-ice surface](#) slope is continuous and Archimedes' flotation condition

$$H\rho = -z_b\rho_w \quad (9)$$

is not satisfied immediately downstream of the GL. A rapid variation in the vertical velocity  $w$  in a short [distance](#) interval at the GL causes oscillations in the [upper-surface-ice surface in the analysis](#) as observed also in FS simulations in [Durand et al. \(2009a\)](#) ([Durand et al.](#)

In [\(Schoof, 2011, Ch. 4.3\)](#) ([Schoof, 2011, Ch. 4.3](#)), the solution to the FS in [a 2D vertical ice](#) is expanded in two parameters

155  $\nu$  and  $\epsilon$ . The aspect ratio of the ice  $\nu$  is the quotient between a typical scale of the [height-thickness](#) of the ice  $\mathcal{H}$  and a [horizontal](#) length scale  $\mathcal{L}$ ,  $\nu = \mathcal{H}/\mathcal{L}$ , and  $\epsilon$  is  $\nu$  times the quotient between the longitudinal and the shear stresses  $\tau_{11}$  and  $\tau_{12}$  in Eq. (2). If  $\nu^{5/2} \ll \epsilon \ll 1$  then in a boundary layer close to the GL and  $x < x_{GL}$  [it follows from the equations that](#) the leading terms in the solution in scaled variables satisfy

$$\tau_{22} - p = \sigma_{22} = \rho g(z - z_s). \quad (10)$$

160 On floating ice  $\tau_{22} - p + p_w = 0$  and the flotation criterion Eq. (9) is fulfilled, ~~and on the bedrock  $\tau_{22} - p + p_w < 0$ , see Eq. and.~~ [This is a first order approximation of the second relation in Eq. \(6\).](#) [On the grounded ice  \$\tau\_{22} - p + p\_w < 0\$ .](#)

~~Introduce the notation~~ [Introducing the notation](#)

$$\chi_a(x, z) = \tau_{22} - p + p_w = \rho g(z - z_s(x)) - \rho_w g z_b(x), \quad (11)$$

and approximate  $z_s$  and  $z_b$  linearly in  $x$  in the vicinity of  $x_{GL}$  and let  $H_{bw}$  and letting  $H_{bw} = -z_b$  be the thickness of the ice  
 165 below the water surface. sea level yields Then

$$\chi_a(x, z_b) = -g(\rho H - \rho_w H_{bw}). \quad (12)$$

is linear in  $x$ . If  $x < x_{GL}$  then  $\chi < 0$   $\chi_a < 0$  in the neighborhood of  $x_{GL}$  on  $\Gamma_{bg}$  and if  $x > x_{GL}$  then  $\chi = 0$   $\chi_a = 0$  and Eq.  
 (9) holds true on  $\Gamma_{bf}$ . Suppose that  $z_s$  and  $z_b$  are linear in  $x$ . Then  $\chi_a$  is also linear in  $x$ . In numerical experiments with the  
 linear FS ( $n = 1$ ) in Nowicki and Wingham (2008),  $\chi(x, z_b)$  (Nowicki and Wingham, 2008),  $\chi_a(x, z_b)$  in the original variables  
 170 varies linearly in  $x$  for  $x < x_{GL}$ . In Sect. 4,  $\chi(x, z_b)$  is  $\chi_a(x, z_b)$  is an approximation of the expression used to estimate the GL  
 position.

### 3 Discretization by FEM

In this section we state the weak form of Eq. (1) and introduce the spatial FEM discretization used for Eq. (1) and give the  
 time-discretization of Eq. (7) and (8).

#### 175 3.1 The weak form of the FS equations

We start by defining the mixed weak form of the FS equations. Introduce  $k = 1 + 1/n$ ,  $k^* = 1 + n$  with  $n$  from Glen's flow law  
 and the spaces

$$\mathbf{V}_k = \{\mathbf{v} : \mathbf{v} \in (W^{1,k}(\Omega))^2\}, \quad Q_{k^*} = \{q : q \in L^{k^*}(\Omega)\}, \quad (13)$$

see, e.g. Chen et al. (2013); Martin and Monnier (2014) (Chen et al., 2013; Jouvét and Rappaz, 2011; Martin and Monnier, 2014).

180 The weak solution  $(\mathbf{u}, p)$  of Eq. (1) is obtained as follows. Find  $(\mathbf{u}, p) \in \mathbf{V}_k \times Q_{k^*}$  such that for all  $(\mathbf{v}, q) \in \mathbf{V}_k \times Q_{k^*}$  the  
 equation

$$A((\mathbf{u}, p), (\mathbf{v}, q)) + B_\Gamma(\mathbf{u}, p, \mathbf{v}, p) + B_{\mathcal{N}}(\mathbf{u}, \mathbf{v}, q) = F(\mathbf{v}), \quad (14)$$

is satisfied, where

$$A((\mathbf{u}, p), (\mathbf{v}, q)) = \int_{\Omega} 2\eta(\mathbf{u}) \dot{\epsilon}(\mathbf{u}) : \dot{\epsilon}(\mathbf{v}) \, dx - b(\mathbf{u}, q) - b(\mathbf{v}, p),$$

$$b(\mathbf{u}, q) = \int_{\Omega} q \nabla \cdot \mathbf{u} \, dx,$$

$$B_\Gamma(\mathbf{u}, \mathbf{v}, p) = \int_{\Gamma_{bg}} (-\sigma_{nn}(\mathbf{u}, p) \mathbf{n} \cdot \mathbf{v} + \beta \mathbf{u} \cdot \mathbf{v}) \, ds,$$

$$B_{\mathcal{N}}(\mathbf{u}, \mathbf{v}, q) = - \int_{\Gamma_{bg}} \sigma_{nn}(\mathbf{v}, q) \mathbf{n} \cdot \mathbf{u} \, ds + \gamma_0 \int_{\Gamma_{bg}} \frac{1}{h} (\mathbf{n} \cdot \mathbf{u}) (\mathbf{n} \cdot \mathbf{v}) \, ds,$$

$$F(\mathbf{v}) = \int_{\Omega} \rho \mathbf{g} \cdot \mathbf{v} \, dx - \int_{\Gamma_{bf}} p_w \mathbf{n} \cdot \mathbf{v} \, ds.$$

185 The last term in  $B_{\mathcal{N}}$  is added in the weak form in Nitsche's method [Nitsche \(1971\)](#) ([Nitsche, 1971](#)) to impose the Dirichlet condition  $u_{\mathbf{n}} = 0$  weakly on  $\Gamma_{bg}$ . It can be considered as a penalty term. The [size-value](#) of the positive parameter  $\gamma_0$  depends on the [application-physical problem](#) and  $h$  is a measure of the mesh size on  $\Gamma_b$ . The [sensitivity of the GL positions for different values of  \$\gamma\_0\$  is shown in Sect. 5](#). The first term in  $B_{\mathcal{N}}$  symmetrizes the boundary term  $B_{\Gamma} + B_{\mathcal{N}}$  on  $\Gamma_{bg}$  and vanishes when  $u_{\mathbf{n}} = 0$ .

### 190 3.2 The discretized FS equations

We employ linear Lagrange elements with Galerkin Least Square (GLS) stabilization [Franca and Frey \(1992\)](#); [Helanow and Ahlkrone \(2018\)](#) avoid spurious oscillations in the pressure using the standard setting in Elmer/ICE [Gagliardini et al. \(2013\)](#) ([Gagliardini et al., 2013](#)) approx solutions in the spaces  $\mathbf{V}_k$  and  $M_k - Q_k^*$  in Eq. (13).

The mesh is constructed from a footprint mesh on the [bottom-surface-ice base](#) and then extruded with the same number of 195 layers [equidistantly](#) in the vertical direction according to the thickness of the [ice sheet](#). To simplify the implementation in 2D, the footprint mesh on the [bottom-surface-ice base](#) consists of  $N+1$  nodes  $x_i, i=0, \dots, N$ , with at  $\mathbf{x}_i = (x_i, z_b(x_i)), i=0, \dots, N$ , with  $x$ -coordinates  $x_i$  and a constant mesh size  $\Delta x \Delta x = x_i - x_{i-1}$ .

In general, the GL is somewhere in the interior of an [element  \$\mathcal{E}\_i = \[x\_i, x\_{i+1}\]\$  interval  \$\[x\_{i-1}, x\_i\]\$](#)  and it crosses the [element interval](#) boundaries as it moves forward in the advance phase and backward in the retreat phase of the ice. The advantage with 200 Nitsche's way of formulating the boundary conditions is that if  $x_{GL} \in \mathcal{E}_i$   $x_{GL} \in [x_{i-1}, x_i]$  then the boundary integral over  $\mathcal{E}_i$  [the interval](#) can be split into two parts in Eq. (14) such that  $[x_i, x_{GL}] \in \Gamma_{bg}$  and  $[x_{GL}, x_{i+1}] \in \Gamma_{bf}$  as follows  $(x, z_b(x)) \in \Gamma_{bg}$  when  $x \in [x_{i-1}, x_{GL}]$  and if  $x \in [x_{GL}, x_i]$  then  $(x, z_b(x)) \in \Gamma_{bf}$  as follows

$$\int_{[x_{i-1}, x_i]} B_{\Gamma} + B_{\mathcal{N}} \, ds = \int_{[x_{i-1}, x_{GL}]} -(\sigma_{\mathbf{nn}}(\mathbf{u}, p) \mathbf{n} \cdot \mathbf{v} + \sigma_{\mathbf{nn}}(\mathbf{v}, q) \mathbf{n} \cdot \mathbf{u}) + \beta \mathbf{u} \cdot \mathbf{v} + \frac{\gamma_0}{h} (\mathbf{n} \cdot \mathbf{u})(\mathbf{n} \cdot \mathbf{v}) \, ds + \int_{[x_{GL}, x_i]} p_w \mathbf{n} \cdot \mathbf{v} \, ds, \quad (15)$$

with the integration element  $ds$  following  $\Gamma_b$ . There is a change of [boundary conditions the boundary condition](#) in the middle 205 of the [element  \$\mathcal{E}\_i\$  FEM element](#) where the GL is located. With a strong formulation of  $u_{\mathbf{n}} = 0$ , the basis functions in  $\mathbf{V}_s - \mathbf{V}_k$  share this property and the condition changes from the grounded node  $x_i - x_{i-1}$  where the basis function satisfies  $u_{\mathbf{n}} = 0$  and the floating node at  $x_{i+1} - x_i$  with a free  $u_{\mathbf{n}}$  without taking the position of the GL inside  $\mathcal{E}_i [x_{i-1}, x_i]$  into account. [With the weak formulation in Nitsche's method no basis function satisfies  \$u\_{\mathbf{n}} = 0\$  strictly but the condition is imposed by the additional penalty term in \(14\) and this term may change inside an element as in \(15\)](#).

210 The resulting system of [non-linear nonlinear](#) equations form a nonlinear complementarity problem [Christensen et al. \(1998\)](#) ([Christensen et al., 1998](#)). The distance  $d$  between the base of the ice and the bedrock at time  $t$  and at  $x$  is  $d = z_b(x, t) - b(x) \geq 0$   $d(x, t) = z_b(x, t) - b(x) \geq 0$ . If  $d > 0$  on  $\Gamma_{bf}$  then the ice is not in contact with the bedrock and  $\sigma_{\mathbf{nn}} + p_w = 0$  and if  $\sigma_{\mathbf{nn}} + p_w < 0$  on  $\Gamma_{bg}$  then the ice and the bedrock are in contact and  $d = 0$ . Hence, the complementarity relation in the vertical direction is

$$z_b(x, t) - b(x) \geq 0, \quad \sigma_{\mathbf{nn}} + p_w \leq 0, \quad (z_b(x, t) - b(x))(\sigma_{\mathbf{nn}} + p_w) = 0 \text{ on } \Gamma_b. \quad (16)$$



215 The contact friction law is such that  $\beta > 0$  when  $x < x_{GL}$  and  $\beta = 0$  when  $x > x_{GL}$ . The complementarity relation along the slope at  $x$  is then the non-negativity of  $d$  and

$$\beta \geq 0, \beta(x, t)(z_b(x, t) - b(x)) = 0 \text{ on } \Gamma_b. \quad (17)$$

In particular, these relations are valid at the nodes  $x = x_j, j = 0, 1, \dots, N$ .

The complementarity condition also holds for  $u_n$  and  $\sigma_{nn}$  such that

220 
$$\sigma_{nn} + p_w \leq 0, \quad u_n(\sigma_{nn} + p_w) = 0 \text{ on } \Gamma_b, \quad (18)$$

without any sign constraint on  $u_n$  except for the retreat phase when the ice leaves the ground and  $u_n < 0$ .

Similar implementations for contact problems using Nitsche's method are found in [Chouly et al. \(2017a, b\)](#), [\(Chouly et al., 2017a, b\)](#), where the unknowns in the PDEs are the displacement fields instead of the velocity in Eq. (1). Analysis in [Chouly et al. \(2017a\)](#) [\(Chouly et al. 2017a\)](#) that Nitsche's method for the contact problem can provide a stable numerical solution with an optimal convergence rate.

225 The nonlinear equations for the nodal values of  $\mathbf{u}$  and  $p$  are solved by [Newton-Picard](#) iterations. The system of linear equations in every [Newton-Picard](#) iteration is solved [iteratively-directly](#) by using the [Generalised-Conjugate-Residual-\(GCR\)-method-MUMPS linear solver](#) in Elmer/ICE. The condition on  [\$d\_j\$  in a  \$d\_i = d\(x\_j\)\$  is used to decide if the node  \$x\_j\$  is used for a so-called grounded mask, which geometrically grounded or floating.](#) It is computed at each timestep and not changed during the nonlinear iterations. [The procedure for solution of the nonlinear FS equations is outlined in Algorithm 1.](#)

### 230 3.3 Discretization of the advection equations

The advection equations for the moving ice boundary in Eq. (7) and (8) are discretized in time by a finite difference method and in space by FEM with linear Lagrange elements for  $z_s$  and  $z_b$ . [A An artificial diffusion](#) stabilization term is added, making the spatial discretization behave like an upwind scheme in the direction of the velocity as implemented in Elmer/ICE.

The advection equations Eq. (7) and Eq. (8) are integrated in time by a semi-implicit method of first order accuracy. Let  
235  $c = s$  or  $b$ . Then the solution is advanced from time  $t^n$  to  $t^{n+1} = t^n + \Delta t$  with the timestep  $\Delta t$  by

$$z_c^{n+1} = z_c^n + \Delta t (a_c^n - u_c^n \frac{\partial z_c^{n+1}}{\partial x} + w_c^n). \quad (19)$$

The spatial derivative of  $z_c$  is approximated by FEM. A system of linear equations is solved at  $t^{n+1}$  for  $z_c^{n+1}$ . This time discretization and its properties are discussed in [Cheng et al. \(2017\)](#) [\(Cheng et al., 2017\)](#) and summarized as in [Algorithm 2](#).

A stability problem in  $z_b$  is encountered in the boundary condition at  $\Gamma_{bf}$  [in Durand et al. \(2009a\)](#) [when the FS equations are solved in \(Durand et al., 2009a\)](#). It is [solved-resolved](#) by expressing  $z_b$  in  $p_w$  at  $\Gamma_{bf}$  with a damping term [in Durand et al. \(2009a\)](#).  
240 An alternative interpretation of the idea in [Durand et al. \(2009a\)](#) [\(Durand et al., 2009a\)](#) and an explanation follow below.

The relation between  $u_n$  and  $u_t$  at  $\Gamma_{bf}$  and  $\mathbf{u}_b = \mathbf{u}(x, z_b(x))$  is

$$\mathbf{u}_b = \begin{pmatrix} u_b \\ w_b \end{pmatrix} = \begin{pmatrix} z_{bx} \\ -1 \end{pmatrix} \frac{u_n}{\sqrt{1 + z_{bx}^2}} + \begin{pmatrix} 1 \\ z_{bx} \end{pmatrix} \frac{u_t}{\sqrt{1 + z_{bx}^2}}, \quad (20)$$

---

**Algorithm 1** Solve the FS equations

---

For a given mesh, compute  $d_j, j = 0, 1, \dots, N$ , for all the nodes  $x_j$  at the ice base.

Mark node  $j$  as geometrically grounded if  $d_j < 10^{-3}$ , otherwise floating.

Find the elements which contain both geometrically grounded and floating nodes, and mark the grounded nodes in these elements as ‘GL nodes’.

Compute the residual of the FS equations with the initial guess of the solution.

**while** the residual is larger than the tolerance **do**

Assemble the FEM matrix for the interior of the domain  $\Omega$

**for** the boundary elements on  $\Gamma_b$  **do**

**if** has ‘GL nodes’ **then**

Mark the current element as a ‘potential GL element’

Use the subgrid scheme in Algorithm 3 of Sect. 4 for the assembly.

**else**

Assemble the boundary element.

**end if**

**end for**

Solve the linearized FS equations for a correction of the solution

Compute the solution and the residual

**end while**

---

---

**Algorithm 2** Time scheme of the GL migration problem

---

Start from an initial geometry  $\Omega^0$  defined by  $z_b^0, z_s^0$ .

**for**  $n = 0$  to  $T/\Delta t - 1$  **do**

Solve the FS equations on  $\Omega^n$  with Algorithm 1, to get the solutions  $\mathbf{u}^n$ .

Solve for  $z_b^{n+1}$  and  $z_s^{n+1}$  with  $\mathbf{u}^n$  with implicit Euler method.

Use  $z_b^{n+1}$  and  $z_s^{n+1}$  to update  $\Omega^{n+1}$

**end for**

---

where  $z_{bx}$  denotes  $\partial z_b / \partial x$ . ~~Insert~~ Inserting  $u_b$  and  $w_b$  from Eq. (20) into Eq. (8) ~~to obtain yields~~

$$245 \quad \frac{\partial z_b}{\partial t} = a_b - u_n \sqrt{1 + z_{bx}^2}, \quad (21)$$

Instead of discretizing Eq. (21) explicitly at  $t^n$  ~~with  $u_n^{n-1}$  to determine  $p_w^n t^{n+1}$~~  with  $u_n^n$  to determine  $p_w^{n+1}$ , the base coordinate is updated implicitly

$$z_b^{n+1} = z_b^{n-1} + \Delta t \left( a_b^{n+1} - u_n^n \sqrt{1 + z_{bx}^{n+1}} \sqrt{1 + (z_{bx}^{n+1})^2} \right) \quad (22)$$

in the solution of Eq. (14).

250 ~~Assume~~ Assuming that  $z_{bx}$  is ~~small. The timestep small, the timestep~~ restriction in Eq. (22) is estimated by considering a 2D slab of the floating ice of width  $\Delta x$  and thickness  $H$ . Newton's law of motion yields

$$M \dot{u}_n = Mg - \Delta x p_w,$$

where  $M = \Delta x (z_s - z_b) \rho$  is the mass of the slab. ~~Divide~~ Dividing by  $M$ , ~~integrate~~ integrating in time for  $u_n(t^m)$ , ~~let  $m = n$  or  $n - 1$ , and approximate~~ letting  $m = n + 1$  or  $n$ , and approximating the integral by the trapezoidal rule for the quadrature ~~to~~

255 ~~obtain yields~~

$$u_n(t^m) = \int_0^{t^m} g + \frac{g \rho_w}{\rho} \frac{z_b}{z_s - z_b} ds \approx gt^m + \frac{g \rho_w}{\rho} \sum_{i=0}^m \alpha_i \frac{z_b^i}{z_s^i - z_b^i} \Delta t = u_n^m,$$

with the parameters

$$\alpha_i = 0.5, \quad i = 0, m, \quad \alpha_i = 1, \quad i = 1, \dots, m - 1.$$

Then insert  $u_n^m$  into Eq. (22). All terms in  $u_n^m$  from timesteps  $i < m$  are collected in the sum  $\Delta t F^{m-1}$ . Then Eq. (22) can be

260 written

$$z_b^{n+1} = z_b^{n-1} - \Delta t^2 \frac{g \rho_w}{2\rho} \frac{z_b^m}{z_s^m - z_b^m} + \Delta t (a_b^n - gt^m - \Delta t F^{m-1}). \quad (23)$$

For small changes in  $z_b$  in Eq. (23), the explicit method with  ~~$m = n - 1$~~   $m = n$  is stable when  $\Delta t$  is so small that

$$|1 - \Delta t^2 \frac{g \rho_w}{2H\rho}| \leq 1. \quad (24)$$

When  $H = 100$  m on the ice shelf,  $\Delta t < 6.1$  s which is far smaller than the stable steps for Eq. (19). Choosing the implicit

265 scheme with  ~~$m = n$~~   $m = n + 1$ , the bound on  $\Delta t$  is

$$1/|1 + \Delta t^2 \frac{g \rho_w}{2H\rho}| \leq 1, \quad (25)$$

i.e. there is no bound on positive  $\Delta t$  for stability but accuracy will restrict  $\Delta t$ .

Much longer stable timesteps are possible at the surface and the base of the ice with a semi-implicit method Eq. (19) and a fully implicit method Eq. (22) compared to an explicit method. For example, the timestep for the problem in Eq. (19) with 1 km

270 mesh size can be up to a couple of months. Therefore, we use the scheme in Eq. (19) for EqEqs. (7) and (8) and the scheme in

Eq. (22) for Eq. (21) and  $p_w$  as in Durand et al. (2009a) (Durand et al., 2009a). The difference between the approximations of  $z_b$  in Eq. (19) and (22) is of  $\mathcal{O}(\Delta t^2)$ .

#### 4 Subgrid ~~modeling~~ scheme around the grounding line

The basic idea of the subgrid ~~method~~ scheme for the FS equations in this paper follows the GL parameterization (SEP3) for  
 275 SSA in Seroussi et al. (2014) (Seroussi et al., 2014) and the analysis for FS in Schoof (2011) (Schoof, 2011). The GL is located  
 at the position where the ice is on the ground and the flotation criterion is perfectly satisfied such that  $\sigma_{nn} = -p_w$ . In the Stokes  
FS equations, the hydrostatic assumption Eq. (9) may not be valid ~~, so the exact~~ close to the GL. Therefore, the GL position  
 can not be determined by simply checking the total thickness of the ice  $H$  against the depth below sea level  $H_{bw} = -z_b H_{bw}$ .  
 Instead, the flotation criterion is computed by comparing the water pressure with the numerical normal stress component  
 280 orthogonal to the boundary ~~as indicated~~, as suggested by the first order analysis in Sect. 2.4. The indicator is here defined by  

$$\chi(x) = \sigma_{nn} + p_w$$

$$\chi(\mathbf{x}) = \sigma_{nn} + p_w, \quad (26)$$

which vanishes on the floating ice and ~~is approximately~~  $\tau_{22} - p + p_w$  ~~and negative~~ is negative and approximately equal to  
 $\chi_a = \tau_{22} - p + p_w$  in (11) on the ground since the slope of the bedrock is small ~~and~~  $\mathbf{n} \approx (0, -1)^T$ .

285 Typically, ~~at the lower surface of the floating ice where~~  $z_b(x, t) > b(x)$ , ~~as the blue line in Fig. 2,~~ The numerical solutions, e.g.  
(Gagliardini et al., 2016; Gladstone et al., 2017), converge to the analytical solution as the mesh size decreases. The analytical  
solution satisfies  $z_b(x, t) > b(x)$  with the boundary conditions ~~are given by~~ in Eq. (6) at the base of the floating ice, and where  
 the ice is in contact with the bedrock ~~, as the red line in Fig. 2~~  $z_b(x, t) = b(x)$ , the boundary conditions are given by Eq. (5).  
~~However, there is another case as shown~~ Examples of the analytical solution are demonstrated by the thin light blue lines in  
 290 Fig. 2 and 3 with a black ‘\*’ at the analytical GL position  $\mathbf{x}_{GL}$ . The two figures share the same analytical solution. However,  
~~as illustrated in Fig. 3 when the net force at~~  $x_i$  ~~is pointing inward, namely~~  $\sigma_{nn}(x_i) + p_w(x_i) > 0$ . Then, ~~the floating boundary~~  
~~condition Eq. should be imposed up until the node~~  $x_{i-1}$ . ~~This can happen at some point due to the low spatial and temporal~~  
~~resolutions, but the node~~  $x_i$  ~~will move upward as long as~~  $\mathbf{u} \cdot \mathbf{n} < 0$ , ~~or 2 and 3, the basal boundary of the ice~~  $z_b(x, t)$  ~~does not~~  
~~conform with the mesh from the spatial discretization. In particular, the GL position~~  $\mathbf{x}_{GL}$  ~~of the analytical solution does not~~  
 295 ~~coincide with any of the nodes, but it usually stays on the bedrock~~  $b(x)$  ~~between the last grounded~~  $(\mathbf{x}_{i-1})$  ~~and the first floating~~  
~~nodes, see Fig. 2 and 3. The linear element between~~  $\mathbf{x}_{i-1}$  ~~and~~  $\mathbf{x}_i$  ~~is denoted by~~  $\mathcal{E}_i$ . The sequence of  $\mathcal{E}_j, j = 1, \dots, N$ ,  
~~approximates~~  $\Gamma_b$ . The grounding line element containing the GL is  $\mathcal{E}_i$ .

Depending on how the mesh is created from the initial geometry and updated during the simulation, the ~~net force switches~~  
~~signs and the condition transforms into the case~~ first floating node at  $\mathbf{x}_i$ , as well as the GL element, can be either on the bedrock  
 300 (as in Fig. 2) or at the basal surface of the ice above the bedrock (as in Fig. 2 ~~when~~  $\sigma_{nn}(x_i) + p_w(x_i) < 0$ ), even though the  
~~corresponding analytical solutions are identical~~. Denote the situation in Fig. 2 by case i, and the one in Fig. 3 by case ii. ~~We~~  
~~call the node ‘grounded’ when it is in contact with the bedrock with net force from the ice pointing outward~~  $(\sigma_{nn} + p_w < 0)$ ,  
~~and ‘floating’ when~~ The physical boundary conditions of the two cases are different only at the GL element. More precisely, in  
 case i, the net force on the node  $\mathbf{x}_i$  is pointing inward, namely  $\chi(\mathbf{x}_i) = \sigma_{nn}(\mathbf{x}_i) + p_w(\mathbf{x}_i) > 0$ , whereas in case ii, the floating  
 305 ~~condition~~  $\sigma_{nn}(\mathbf{x}_i) + p_w(\mathbf{x}_i) = 0$  is satisfied in the node  $\mathbf{x}_i$ . The directions of the net force ~~is pointing inward~~  $(\sigma_{nn} + p_w \geq 0)$ .  
~~The element which contains both grounded and floating nodes is called~~ at  $\mathbf{x}_{i-1}$  and  $\mathbf{x}_i$  are shown by the arrows in the upper

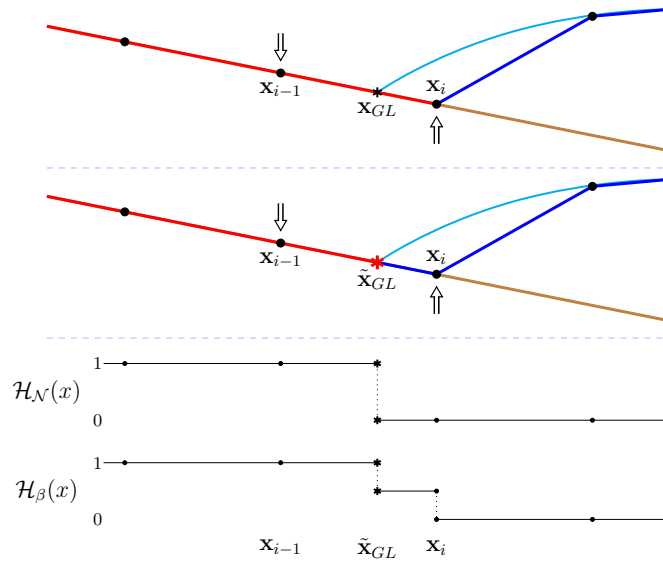

**Figure 2.** Schematic figure of the GL in case i, with the arrows indicating the direction of the net forces. Upper panel: The last grounded and first floating nodes as defined in Elmer/ICE. The light blue line is the analytical solution of the ice sheet with the analytical GL position  $x_{GL}$ . Middle panel: Linear interpolation to approximate the numerical GL position  $\tilde{x}_{GL}$ . Lower panel: The step functions  $\mathcal{H}_N(x)$  and  $\mathcal{H}_\beta(x)$  which indicate the area for Nitsche's penalty and slip boundary conditions.

panels of Fig. 2 and 3. Consequently, the external forces imposed on the GL element ~~and the grounded node in it is called the last grounded node and the floating one is called the first floating node~~ are different in the two cases. For instance, in case i, the GL element is considered as geometrically grounded, shown with red color in the upper panel of Fig. 2. In case ii, the GL element is treated as geometrically floating and colored in blue in the upper panel of Fig. 3.

~~In coarse meshes,~~ These two cases are similar to the LG and FF cases in (Gagliardini et al., 2016) implying that the numerical solutions in the the two cases are different, especially on a coarse mesh (mesh size at about 100 m or larger). Thus, we propose a subgrid scheme to reduce these differences in the spatial discretization and to capture the GL migration without using a fine mesh. The schematic drawing of the subgrid scheme for the two cases is shown in the ~~true position of the GL is generally not in one of the nodes, but usually between the last grounded~~ middle panels of Fig. 2 and 3. The GL element is divided into the grounded (red) and floating (blue) parts by the estimated GL position  $\tilde{x}_{GL}$  on  $\mathcal{E}_i$ , which is the numerical approximation of the analytical GL position  $x_{GL}$ .

To determine the position  $\tilde{x}_{GL}$ , we solve  $\chi(\tilde{x}_{GL}) = \sigma_{nn}(\tilde{x}_{GL}) + p_w(\tilde{x}_{GL}) = 0$  by linear interpolation between  $\chi(\mathbf{x}_{i-1})$  and ~~the first floating nodes. Instead of refining the mesh around GL, which would lead to very small time steps for stability reasons,~~ we will here introduce a subgrid model for  $\chi(\mathbf{x}_i)$  such that

$$\tilde{x}_{GL} = \mathbf{x}_{i-1} - \frac{\chi(\mathbf{x}_{i-1})}{\chi(\mathbf{x}_{i-1}) - \chi(\mathbf{x}_i)} (\mathbf{x}_{i-1} - \mathbf{x}_i). \quad (27)$$

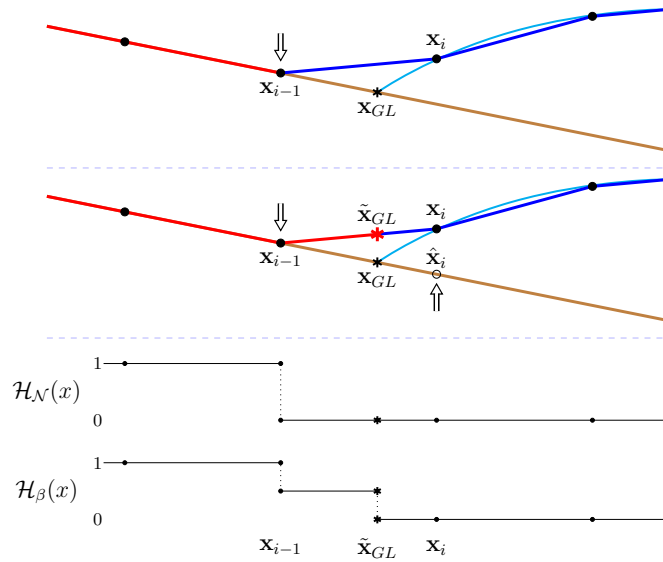

**Figure 3.** Schematic figure of the GL in case ii, with the arrows indicating the direction of the net force. Upper panel: The last grounded and first floating nodes as defined in Elmer/ICE. The light blue line is the analytical solution of the ice sheet with the analytical GL position  $x_{GL}$ . The node  $x_i$  is fully floating and the net force is 0. Middle panel: Linear interpolation to approximate the numerical GL position  $\tilde{x}_{GL}$ . The point  $\hat{x}_i$  on the bedrock has the same  $x$  coordinate as  $x_i$ . Lower panel: The step functions  $\mathcal{H}_N(x)$  and  $\mathcal{H}_\beta(x)$  which indicate the area for Nitsche's penalty and slip boundary conditions.

The water pressure  $p_w(\mathbf{x})$  is a linear function of  $\mathbf{x}$  on the GL element –

We let  $\chi(x) = \sigma_{nn}(x) + p_w(x)$  and assume that it is linear as in Eq. to determine the position of the GL,  $x_{GL}$ , in the GL element. In and the numerical solution of  $\sigma_{nn}(\mathbf{x})$  is also piecewise linear on every element with the standard Lagrange elements in Elmer/ICE (Gagliardini et al., 2013). In this sense,  $\tilde{x}_{GL}$  is the best numerical approximation of the analytical GL position  $x_{GL}$  in the current framework. This approach fits well with case iii, the GL is located between  $x_{i-1}$  and  $x_i$  even though the whole element  $[x_{i-1}, x_i]$  is geometrically grounded. The equation  $\chi(x_{GL}) = 0$  is solved by linear interpolation between  $\chi(x_{i-1}) < 0$  and  $\chi(x_i) > 0$  yielding a unique solution satisfying  $x_{i-1} < x_{GL} < x_i$ , depicted as the red dot in the lower panel of Fig. 3 since the indicator  $\chi(\mathbf{x})$  has opposite signs at  $x_{i-1}$  and  $x_i$ , see the middle panel of Fig. 2 where  $\tilde{x}_{GL}$  is marked by a red '\*'. It guarantees the existence and uniqueness of  $\tilde{x}_{GL}$  on the GL element.

There is a more complicated However, the situation in case iii, where  $\chi(x_i) < 0$  but  $\chi(x_{i+1}) = 0$  due to the floating boundary condition. A correction of  $\chi$  is made by using  $\tilde{\chi}(x) = \sigma_{nn}(x) + p_b(x)$  where  $p_b(x) = -\rho_w g b(x)$  is more complicated. In the upper panel of Fig. 3, as the elements on both sides of the node  $x_i$  are geometrically floating, the boundary condition imposed on  $x_i$  becomes  $\chi(x_i) = \sigma_{nn}(x_i) + p_w(x_i) = 0$ . Considering that the analytical GL position  $x_{GL}$  always stays on the bedrock, a correction of  $\chi(\mathbf{x})$  is introduced in case ii by  $\tilde{\chi}$  in

$$\tilde{\chi}(\mathbf{x}) = \sigma_{nn}(\mathbf{x}) + p_b(\mathbf{x}), \quad (28)$$

where  $p_b(\mathbf{x}) = -\rho_w g b(x)$  is the water pressure on the bedrock. For  $x > x_i$ , we have  $b(x) < z_b(x)$  and  $p_b(x) > p_w(x)$ . Therefore,  $\tilde{\chi}(x_{i+1}) > \chi(x_{i+1}) = 0$  and  $\tilde{\chi}(x_i) = \chi(x_i) < 0$ . Then, a linear interpolation between  $\tilde{\chi}(x_i)$  and  $\tilde{\chi}(x_{i+1})$  guarantees a unique solution of  $\tilde{\chi}(x_{GL}) = 0$  in the GL element  $[x_i, x_{i+1}]$ , see Fig. 2. In  $\mathbf{x}_i$  as in Eq. (27). If we compare with case iii,  $p_b$  can also be used since  $p_b(x) = p_w(x)$  as long as the element is on the bedrock.

Conceptually, this correction can be considered as using  $\sigma_{nn}(\tilde{\mathbf{x}}_{GL})$  to approximate  $\sigma_{nn}(\mathbf{x}_{GL})$  on a virtual element between  $\mathbf{x}_{i-1}$  and  $\hat{\mathbf{x}}_i$ , since the linear interpolation of the function  $\tilde{\chi}(x)$  can be considered separately by looking at the two linear functions  $\sigma_{nn}(x)$  and  $p_b(x)$ . As the GL always rests on the bedrock,  $p_b(x_{GL}) = p_w(x_{GL})$  is actually an exact representation of the water pressure imposed on the ice at GL, although geometrically  $z_b(x_{GL})$  may not coincide with  $b(x_{GL})$ , especially on coarse meshes. This also leads to the fact that the interpolated normal stress  $\sigma_{nn}(x_{GL}, z_b(x_{GL}))$  is a first-order  $p_b(\mathbf{x})$  still provides the analytical water pressure along the bedrock. Therefore, the position  $\tilde{\mathbf{x}}_{GL}$  is a numerical approximation of the normal stress at the exact GL position  $(x_{GL}, b(x_{GL}))$ .

This GL position, although it is not geometrically in contact with the bedrock. Moreover, this correction is not necessary when the GL is advancing since the implicit treatment of the bottom surface is equivalent to additional water pressure at the stress boundary moving  $\mathbf{x}_i$  towards  $\hat{\mathbf{x}}_i$  with  $u_n > 0$  in Eq. (21) as discussed in Sect. 3.3.

Since we have  $p_b(\mathbf{x}) = p_w(\mathbf{x})$  and  $\chi(\mathbf{x}) = \tilde{\chi}(\mathbf{x})$  at the GL element in case i, we can simply use  $\tilde{\chi}(\mathbf{x})$  to find  $\tilde{\mathbf{x}}_{GL}$  for the two cases by replacing  $\chi$  in (27) by  $\tilde{\chi}$ . After the GL position is determined, the domains  $\Gamma_{bg}$  and  $\Gamma_{bf}$  are separated at  $x_{GL} = \tilde{x}_{GL}$  as in Eq. (15) and the integrals on the GL element are calculated with a high-order integration scheme as in Seroussi et al. (2014) to achieve a better (Seroussi et al., 2014). We introduce two step functions  $\mathcal{H}_N(x)$  and  $\mathcal{H}_\beta(x)$  to include and exclude quadrature points in the integration of the Nitsche's term and the slip boundary condition. To achieve a reasonable resolution within the element shown in Figures 2 and 3. For a smoother transition of  $\beta$  GL element, as suggested in (Seroussi et al., 2014), at  $GL$ , the slip coefficient is multiplied by 1/2 at the whole GL element before integrating using the high-order scheme least tenth order Gaussian quadrature is required.

The penalty term from in Nitsche's method restricts the motion of the element in the normal direction. It should only be imposed on the element which is fully on the ground. On the contrary, in case ii, the GL element  $[x_i, x_{i+1}] \mathcal{E}_i$  is not in contact with the bedrock as in Fig. 2, so only, see Fig. 3. Only the floating boundary condition should be used on the element  $[x_i, x_{i+1}]$ . Additionally, GL element. When the FS equations are solved, the implicit representation of the bottom surface update of the basal surface with  $u_n < 0$  in Eq. (22) also implies that the ease last grounded node in the previous timestep is leaving the bedrock when the ice is retreating and the GL moves to the adjacent element. Case iii with retreating GL should be merged to will not appear in that situation with a retreating GL and as in case iii since the surface is leaving the bedrock and the normal velocity on the element should not be forced to zero. To summarize, Nitsche's penalty term should be imposed on all the fully grounded elements and partially on the GL element in the advance phase as in case i. The step function  $\mathcal{H}_N(x)$  indicates how Nitsche's method is implemented on the boundary elements, see the lower panels of Fig. 2 and 3 for the two cases. The penalty term contributes to the integration only when  $\mathcal{H}_N(x) = 1$ .

375 Schematic figure of Grounding Line in case 1. Upper panel: the last grounded and first floating nodes as defined in Elmer/ICE. Lower panel: linear interpolation to compute a more accurate position of the Grounding Line. The slip coefficient  $\beta$  is treated similarly with the step function  $\mathcal{H}_\beta(x)$ , where  $\mathcal{H}_\beta(x) = 1$  is on the fully grounded elements and  $\mathcal{H}_\beta(x) = 0$  on the floating elements. For a smoother transition of  $\beta$  at the GL, the step function is set to be 1/2 in parts of the GL element before integrating using the high order scheme. In case i, full friction is applied at the grounded part between  $\mathbf{x}_{i-1}$  and  $\tilde{\mathbf{x}}_{GL}$  of the GL element since this part is also grounded in the analytical solution. Then, the friction is lower in the remaining part of  $\mathcal{E}_i$ . For the floating part between  $\tilde{\mathbf{x}}_{GL}$  and  $\mathbf{x}_i$  in case ii, there is no friction and  $\mathcal{H}_\beta(x) = 0$  and we have reduced friction between  $\mathbf{x}_{i-1}$  and  $\tilde{\mathbf{x}}_{GL}$ , see the lower panel of 3. The boundary integral Eq. (15) is now rewritten with the two step functions as

$$380 \int_{\mathcal{E}_i} B_\Gamma + B_N \, ds = \int_{\mathcal{E}_i} -\mathcal{H}_N(\sigma_{nn}(\mathbf{u}, p)\mathbf{n} \cdot \mathbf{v} + \sigma_{nn}(\mathbf{v}, q)\mathbf{n} \cdot \mathbf{u}) + \mathcal{H}_\beta \beta \mathbf{u} \cdot \mathbf{v} + \mathcal{H}_N \frac{\gamma_0}{h} (\mathbf{n} \cdot \mathbf{u})(\mathbf{n} \cdot \mathbf{v}) + (1 - \mathcal{H}_N) p_w \mathbf{n} \cdot \mathbf{v} \, ds. \quad (29)$$

Schematic figure of Grounding Line in case 2. Upper panel: the last grounded and first floating nodes as defined in Elmer/ICE. Lower panel: linear interpolation to compute a more accurate position of the Grounding Line. A summary of the discussion is:

- Advance phase  $\Rightarrow$  case i or case ii
- 385 - Retreat phase  $\Rightarrow$  case ii

The case is determined by the geometry of the GL element.

The algorithm for the GL element is:

---

### Algorithm 3 Subgrid modeling for the GL element

---

- Take all the ‘potential GL elements’ and solve  $\tilde{\chi}(\mathbf{x}) = 0$  to find  $\tilde{\mathbf{x}}_{GL}$  and the GL element.
  - Determine which case this GL element belongs to by checking the geometrical conditions at  $\mathbf{x}_i$
  - Specify  $\mathcal{H}_N(x)$  and  $\mathcal{H}_\beta(x)$  based on  $\tilde{\mathbf{x}}_{GL}$  depending on the case and the advance or retreat phase.
  - Integrate Eq. (29) for the FEM matrix assembly.
- 

Equations (1), (7), and (8) form a system of coupled nonlinear equations. They are solved in the same manner as in Elmer/ICE v.8.3. The  $\mathbf{x}_{GL}$  position is determined dynamically within every nonlinear iteration when solving the FS equations and the high order integrations are based on the current  $\mathbf{x}_{GL}$ . The nonlinear FS is solved with fixed-point iterations to detailed procedure is explained in Algorithms 1, 2, and 3. The solution to the nonlinear FS system is computed with Picard iterations to a  $10^{-5}$  relative error with a limit of maximal 25 nonlinear iterations and the grounded condition is set if the distance between of the bottom surface and the bedrock is smaller than  $10^{-3}$  m. The  $\tilde{\mathbf{x}}_{GL}$  position is determined dynamically during each fixed-point iteration by solving Eq. (27) with  $\tilde{\chi}$  and the solution  $\sigma_{nn}(\mathbf{x})$  from the previous nonlinear iteration, and the step functions  $\mathcal{H}_N$  and  $\mathcal{H}_\beta$  are adjusted accordingly.

395



## 5 Results

The numerical experiments follow the MISIMIP benchmark [Pattyn et al. \(2012\)](#) and [\(Pattyn et al., 2012\)](#) and a comparison is made with the results in [Gagliardini et al. \(2016\)](#) ([Gagliardini et al., 2016](#)). Using the experiment MISIMIP 3a, the setups are exactly the same as in the advancing and retreating simulations in [Gagliardini et al. \(2016\)](#) ([Gagliardini et al., 2016](#)). The experiments are run with spatial resolutions of  $\Delta x = 4$  km, 2 km and 1 km ~~with 20 vertical extruded layers~~. ~~The mesh at the base is extruded vertically in 20 layers with equidistantly placed nodes in each vertical column~~. The timestep is  $\Delta t = 0.125$  year for all the three resolutions to eliminate time discretization errors when comparing different spatial resolutions.

The dependence on  $\gamma_0$  for the retreating ice is shown in Fig. 4 with  $\gamma_0$  between  $10^4$  and  $10^9$ . The estimated GL positions do not vary with different choices of  $\gamma_0$  from  $10^5$  to  $10^8$  which suggests a suitable range of  $\gamma_0$ . If  $\gamma_0$  is too small ( $\gamma_0 \ll 10^4$ ), oscillations appear in the estimated GL positions. If  $\gamma_0$  is too large ( $\gamma_0 \gg 10^8$ ), then more nonlinear iterations ~~are needed for each time step in Algorithm 1~~ ~~are needed in each timestep~~. The same dependency of  $\gamma_0$  is observed for the advance experiments and for different mesh resolutions as well. ~~For The results are not very sensitive to  $\gamma_0$  and for the remaining experiments, we fix we choose  $\gamma_0 = 10^6$ .~~

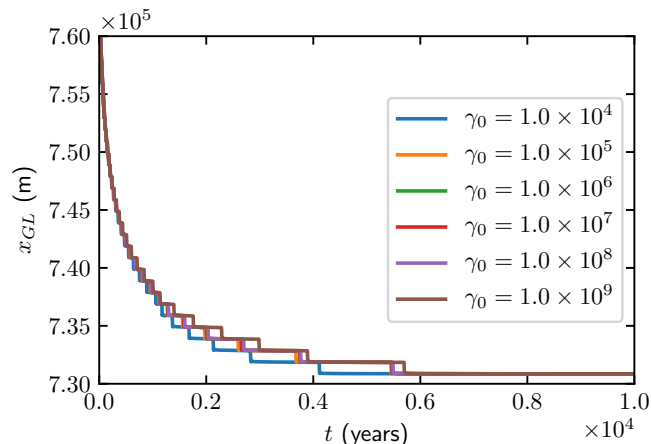

**Figure 4.** The MISIMIP 3a retreat experiment with  $\Delta x = 1000$  m for different choices of  $\gamma_0$  in the time interval  $[0, 10000]$  years.

The GL position during 10000 years in the advance and retreat phases are displayed in Fig. 5 for different ~~mesh sizes~~ ~~mesh resolutions~~. The range of the results from [Gagliardini et al. \(2016\)](#) ~~with mesh resolutions~~ ([Gagliardini et al., 2016](#)) with  $\Delta x = 25$  and 50 m are shown as background shaded regions with colors purple and pink, ~~respectively~~. We achieve similar GL migration results both for the advance and retreat experiments with at least 20 times larger ~~mesh sizes~~ ~~mesh resolutions~~.

We observed oscillations at the ~~top surface~~ ~~ice surface~~ near the GL in all the experiments as expected from [Durand et al. \(2009a\)](#); [Schoof \(2007\)](#). A zoom-in plot of the surface elevation with  $\Delta x = 1$  km at  $t = 10000$  years is shown to the left in Fig. 6, where the red dashed line indicates the estimated GL position. Obviously, the estimated GL position does not coincide with any nodes even at the steady state.

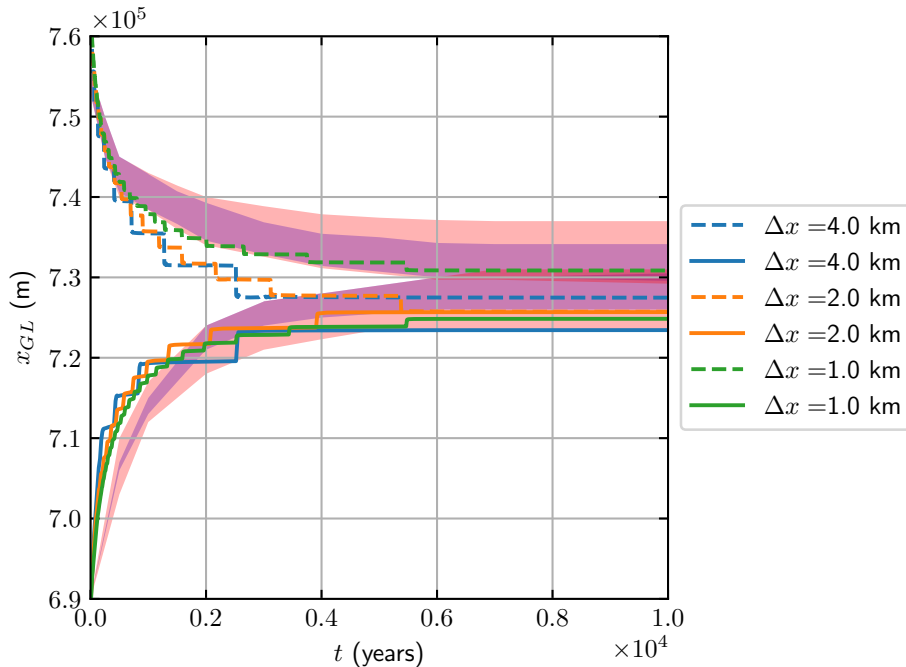

**Figure 5.** The MISMIP 3a experiments for the GL position when  $t \in [0, 10000]$  with  $\Delta x = 4000, 2000$  and  $1000$  m for the advance (solid) and retreat (dashed) phases. The shaded regions indicate the range of the results in [Gagliardini et al. \(2016\)](#) with  $\Delta x = 50$  m in red and  $\Delta x = 25$  m in blue.

The ratio between the thickness below sea level  $H_{bw}$  and the ice thickness  $H$  is shown in Fig. 6. The horizontal, purple, dash-dotted line indicates the ratio of  $\rho/\rho_w$  and the estimated GL is located at the red, dashed line. This result confirms that the hydrostatic assumption  $H\rho = H_{bw}\rho_w$  in Eq. (9) is not valid in the FS equations for  $x > x_{GL}$  close to the GL and at the GL position, cf. [Durand et al. \(2009a\)](#); [Schoof \(2011\)](#) ([Durand et al., 2009a](#); [Schoof, 2011](#)). For  $x < x_{GL}$  we have that  $H_{bw}/H < \rho/\rho_w$  since  $H_{bw}$  decreases and  $H$  increases. The conclusion from numerical experiments in [van Dongen et al. \(2018\)](#) ([van Dongen et al., 2018](#)) is that the hydrostatic assumption and the SSA equations approximate the FS equations well for the floating ice beginning at a short distance away from the GL.

The top and bottom surface velocity solutions from the retreat experiment are shown in Fig. 7 with  $\Delta x = 1$  km after 10000 years. The horizontal velocities on the two surfaces are similar with negligibly small differences on the floating ice as expected. The vertical velocities  $w$  on the top surface (orange line) and bottom surface (blue line) at the GL are almost discontinuous as analyzed in [Schoof \(2011\)](#) ([Schoof, 2011](#)). With the subgrid method, the rapid variation is resolved by the 1 km mesh size.

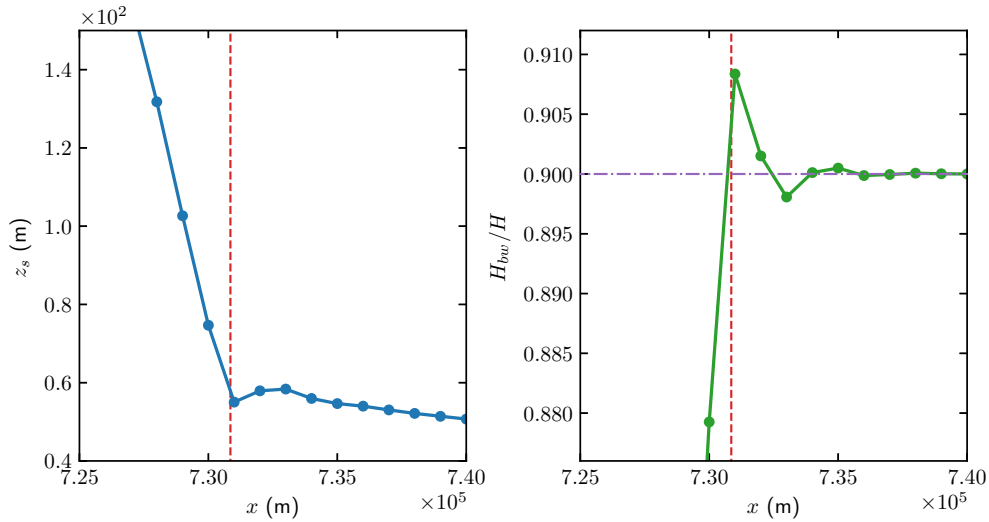

**Figure 6.** Details of the solutions for the retreat experiment with  $\Delta x = 1$  km after 10000 years. The solid dots represent the nodes of the elements and the vertical, red, dashed lines indicate the GL position. *Left panel:* The oscillations at top ice surface near GL. *Right panel:* The flotation criterion is evaluated by  $H_{bw}/H$ . The ratio between  $\rho/\rho_w$  is drawn in a horizontal, purple, dash-dotted line.

## 6 Discussion

430 Seroussi et al ~~Seroussi et al. (2014)~~ (Seroussi et al., 2014) describe four different subgrid models (NSEP, SEP1, SEP2 and SEP3) for the friction in SSA and evaluate them in a FEM discretization on a triangulated, planar domain. The hydrostatic flotation criterion is applied at the nodes of the triangles. ~~Depending~~ In the NSEP, an element is floating or not depending on how many of the nodes that are floating, the. In the other three methods, an inner structure in the triangular element is introduced. One part of a triangle is floating and one part is grounded. The amount of friction in the triangle is determined.

435 ~~Also, a triangle with the GL is determined by the flotation criterion. Either the friction coefficient is reduced, the integration in the element only includes the grounded part, or a higher order polynomial integration over the triangles in FEM allows an inner structure in the triangular element~~ (SEP3) is applied. Faster convergence as the mesh is refined is observed for the latter methods compared to the first method. The discretization of the friction in Sect. 4 is similar to the SEP3 method but the FS equations also require a subgrid treatment of the normal velocity condition. In the method for the FS equations in

440 (Gagliardini et al., 2016), the GL position is in a node and the friction coefficient is approximated in three different ways. The coefficient is discontinuous at the node in one case (DI in (Gagliardini et al., 2016)). Our coefficient is also discontinuous but at the estimated location of the GL between the nodes.

The convergence of the steady state GL position toward the reference solutions in (Gagliardini et al., 2016) is observed in the simulations in Fig. 5. However, as the meshes we used are more than 40 times larger than the 25 m finest resolution in

445 (Gagliardini et al., 2016), it is still far from the asymptote. At the current resolutions, the discretization introduces strong mesh

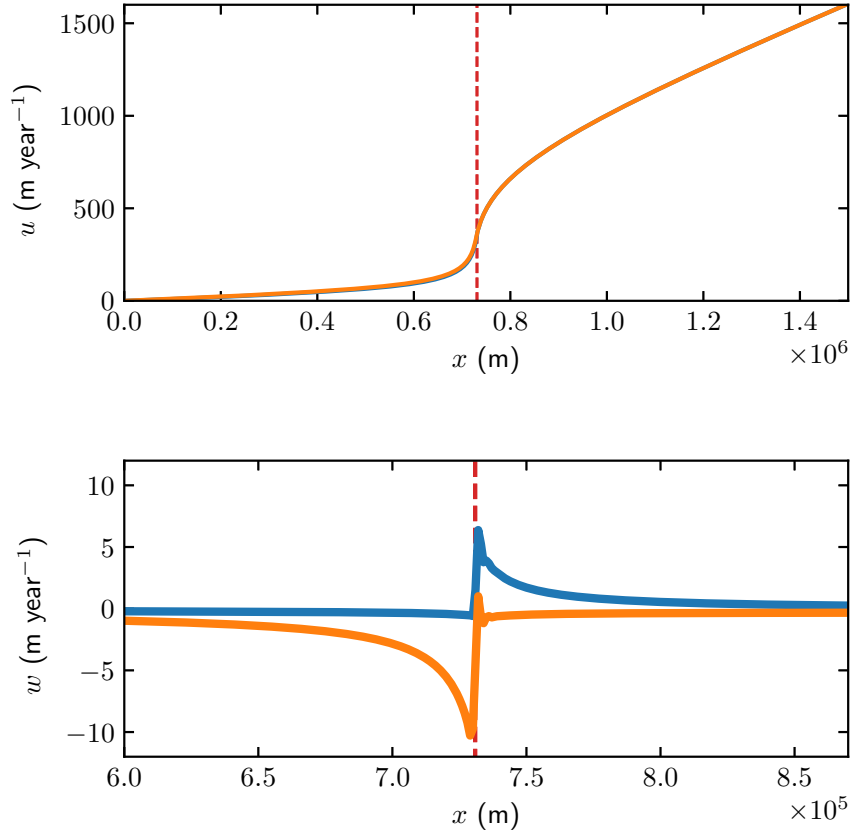

**Figure 7.** The velocities  $u$  (upper panel) and  $w$  (lower panel) on the top surface (orange) and bottom the base (blue) surface of the ice in the retreat experiment with  $\Delta x = 1$  km after 10000 years. The red, dashed line indicates marks the GL position. The vertical velocity  $w$  is zoomed-in close to the GL.

effect such as the two different geometrical interpretations in the two cases mentioned in Sect. 4. The subgrid scheme is able to provide a more accurate representation of the GL position and the boundary conditions, but the numerical solution of the velocity field, pressure as well as the two free surfaces are still determined by the coarse mesh, which are the main sources of the numerical errors.

450 Our method can be extended to a triangular mesh covering  $\Gamma_b$  in the following way. The condition on  $\chi$   $\tilde{\chi}$  in Eq. (28) is applied on the edges of each triangle  $\mathcal{T}$  in the mesh. If  $\chi < 0$   $\tilde{\chi} < 0$  in all three nodes then  $\mathcal{T}$  is grounded. If  $\chi \geq 0$   $\tilde{\chi} \geq 0$  in all nodes then  $\mathcal{T}$  is floating. The GL passes inside  $\mathcal{T}$  if  $\chi$   $\tilde{\chi}$  has a different sign in one of the nodes. Then the GL crosses the two edges where  $\chi < 0$   $\tilde{\chi} < 0$  in one node and  $\chi \geq 0$   $\tilde{\chi} \geq 0$  in the other node. In this way, a continuous reconstruction of a piecewise linear GL is possible on  $\Gamma_b$ . The FEM approximation is modified in the same manner as in Sect. 4 with using step  
 455 functions in Nitsche's method.

An alternative to ~~subgrid modeling a subgrid scheme~~ is to introduce dynamic adaptation of the mesh on  $\Gamma_b$  with a refinement at the GL as in e.g. ~~Cornford et al. (2013); Drouet et al. (2013); Gladstone et al. (2010a)~~ ([Cornford et al., 2013](#); [Drouet et al., 2013](#); [Gladstone et al., 2010a](#)). In general, a fine mesh is needed along the GL and in an area surrounding it. Since the GL moves long distances at least in simulations of palaeo-ice sheets, the adaptation should be dynamic, permit refinement and coarsening of the mesh, and be based on some estimate of the ~~model inaccuracy~~ [numerical error of the method](#). Furthermore, shorter timesteps are necessary for stability when the mesh size is smaller in a mesh adaptive method. Introducing a time dependent mesh adaptivity into an existing code requires a substantial coding effort and will increase the computational work considerably. Subgrid modeling is easier to implement and the increase in computing time is small.

## 7 Conclusions

~~Subgrid models~~ [A subgrid scheme](#) at the GL ~~have has~~ been developed and tested in the SSA model for 2D ~~flow~~ [vertical ice flow in \(Gladstone et al., 2010b\)](#) and in [Gladstone et al. \(2010b\)](#) and for 3D flow in [Seroussi et al. \(2014\)](#) ([Seroussi et al., 2014](#)), for the friction in the vertically integrated model BISICLES [Cornford et al. \(2013\)](#) for 3D flow in [Cornford et al. \(2016\)](#) ([Cornford et al., 2013](#)) for 2D flow in ([Cornford et al., 2016](#)), and for the PISM model mixing SIA with SSA in 3D in [Feldmann et al. \(2014\)](#) ([Feldmann et al., 2014](#)). Here we propose a subgrid ~~model in 2D~~ [scheme](#) for the FS equations [for a 2D vertical ice](#), implemented in Elmer/ICE, that can be extended to 3D. The mesh is static and the moving GL position within one element is determined by linear interpolation with an auxiliary function  ~~$\tilde{\chi}$  based on the theory in Schoof (2011)~~  $\tilde{\chi}(\mathbf{x})$ . Only in that element, the FEM discretization is modified.

The ~~method~~ [numerical scheme](#) is applied to the simulation of ~~an ice sheet in a~~ 2D [vertical ice sheet](#) with an advancing GL and one with a retreating GL. The ~~data~~ [model setups](#) for the tests are the same as in one of the MISMIP examples [Pattyn et al. \(2012\)](#) and in [Gagliardini et al. \(2016\)](#) ([Pattyn et al., 2012](#)) and in ([Gagliardini et al., 2016](#)). Comparable results to [Gagliardini et al. \(2016\)](#) ~~are obtained with subgrid modeling~~ ([Gagliardini et al., 2016](#)) [are obtained using the subgrid scheme](#) with more than 20 times larger mesh sizes. A larger mesh size also allows a longer timestep for the time integration. ~~Without further knowledge of the basal conditions and detailed models at the GL, solving  $\tilde{\chi}(x) = 0$~~  [Solving  \$\tilde{\chi}\(\mathbf{x}\) = 0\$  for  \$\mathbf{x}\_{GL}\$](#)  provides a good approximation of the GL position.

*Code availability.* The FS sub-grid model is implemented based on Elmer/ICE Version: 8.3 (Rev: f6bfdc9) with the scripts at <http://doi.org/10.5281/zenodo.3401478> and <http://doi.org/10.5281/zenodo.3401475>.

*Author contributions.* GC developed the model code and performed the simulations. GC and PL contributed to the theory of the paper. GC, PL and LvS contributed to the development of the method and the writing of the paper

*Competing interests.* The authors declare that they have no conflict of interest.

*Acknowledgements.* This work has been supported by Nina Kirchner's Formas grant 2017-00665 and the Swedish e-Science initiative  
485 eSENCE. We are grateful to Thomas Zwinger for advise and help in the implementation of the subgrid ~~model~~-scheme in Elmer/ICE.  
The computations were performed on resources provided by the Swedish National Infrastructure for Computing (SNIC) at the PDC Center  
for High Performance Computing, KTH Royal Institute of Technology.

## References

- 490 Brondex, J., Gagliardini, O., Gillet-Chaulet, F., and Durand, G.: Sensitivity of grounding line dynamics to the choice of the friction law, *J. Glaciology*, 63, 854–866, 2017.
- Chen, Q., Gunzburger, M., and Perego, M.: Well-posedness results for a nonlinear Stokes problem arising in glaciology, *SIAM Journal on Mathematical Analysis*, 45, 2710–2733, 2013.
- Cheng, G. and Lötstedt, P.: Parameter sensitivity analysis of dynamic ice sheet models-Numerical computations, *The Cryosphere Discussions*, 2019, 1–28, 2019.
- 495 Cheng, G., Lötstedt, P., and von Sydow, L.: Accurate and stable time stepping in ice sheet modeling, *Journal of Computational Physics*, 329, 29–47, 2017.
- Chouly, F., Fabre, M., Hild, P., Mlika, R., Pousin, J., and Renard, Y.: An overview of recent results on Nitsche’s method for contact problems, in: *Geometrically unfitted finite element methods and applications*, pp. 93–141, Springer, 2017a.
- Chouly, F., Hild, P., Lleras, V., and Renard, Y.: Nitsche-based finite element method for contact with Coulomb friction, in: *European Conference on Numerical Mathematics and Advanced Applications*, pp. 839–847, Springer, 2017b.
- 500 Christensen, P. W., Klarbring, A., Pang, J. S., and Strömberg, N.: Formulation and comparison of algorithms for frictional contact problems, *Int. J. Num. Meth. Eng.*, 42, 145–173, 1998.
- Cornford, S., Martin, D., Lee, V., Payne, A., and Ng, E.: Adaptive mesh refinement versus subgrid friction interpolation in simulations of Antarctic ice dynamics, *Ann. Glaciol.*, 57, 1–9, 2016.
- 505 Cornford, S. L., Martin, D. F., Graves, D. T., Ranken, D. F., Brocq, A. M. L., Gladstone, R. M., Payne, A. J., Ng, E. G., and Lipscomb, W. H.: Adaptive mesh, finite volume modeling of marine ice sheets, *J. Comput. Phys.*, 232, 529–549, 2013.
- DeConto, R. M. and Pollard, D.: Contribution of Antarctica to past and future sea-level rise, *Nature*, 531, 591–597, 2016.
- Docquier, D., Perichon, L., and Pattyn, F.: Representing grounding line dynamics in numerical ice sheet models: Recent advances and outlook, *Surv. Geophys.*, 32, 417–435, 2011.
- 510 van Dongen, E. C. H., Kirchner, N., van Gijzen, M. B., van de Wal, R. S. W., Zwinger, T., Cheng, G., Lötstedt, P., and von Sydow, L.: Dynamically coupling full Stokes and shallow shelf approximation for marine ice sheet flow using Elmer/ICE (v8. 3), *Geoscientific Model Development*, 11, 4563–4576, 2018.
- Drouet, A. S., Docquier, D., Durand, G., Hindmarsh, R., Pattyn, F., Gagliardini, O., and Zwinger, T.: Grounding line transient response in marine ice sheet models, *Cryosphere*, 7, 395–406, 2013.
- 515 Durand, G. and Pattyn, F.: Reducing uncertainties in projections of Antarctic ice mass loss, *Cryosphere*, 9, 2043–2055, 2015.
- Durand, G., Gagliardini, O., de Fleurian, B., Zwinger, T., and Le Meur, E.: Marine ice sheet dynamics: Hysteresis and neutral equilibrium, *J. Geophys. Res.: Earth Surf.*, 114, F03 009, 2009a.
- Durand, G., Gagliardini, O., Zwinger, T., Le Meur, E., and Hindmarsh, R. C. A.: Full Stokes modeling of marine ice sheets: influence of the grid size, *Ann. Glaciol.*, 50, 109–114, 2009b.
- 520 Feldmann, J., Albrecht, T., Khroulev, C., Pattyn, F., and Levermann, A.: Resolution-dependent performance of grounding line motion in a shallow model compared with a full-Stokes model according to the MISMIP3d intercomparison, *J. Glaciol.*, 60, 353–360, 2014.
- Franca, L. P. and Frey, S. L.: Stabilized finite element methods: II. The incompressible Navier-Stokes equations, *Computer Methods in Applied Mechanics and Engineering*, 99, 209–233, 1992.

- Gagliardini, O., Zwinger, T., Gillet-Chaulet, F., Durand, G., Favier, L., de Fleurian, B., Greve, R., Malinen, M., Martín, C., Råback, P.,  
525 Ruokolainen, J., Sacchetti, M., Schäfer, M., Seddik, H., and Thies, J.: Capabilities and performance of Elmer/Ice, a new generation  
ice-sheet model, *Geosci. Model Dev.*, 6, 1299–1318, 2013.
- Gagliardini, O., Brondex, J., Gillet-Chaulet, F., Tavar, L., Peyraud, V., and Durand, G.: On the substantial influence of the treatment of  
friction at the grounding line, *Cryosphere*, 9, 3475–3501, 2015.
- Gagliardini, O., Brondex, J., Gillet-Chaulet, F., Tavar, L., Peyraud, V., and Durand, G.: Impact of mesh resolution for MISMIP and MIS-  
530 MIP3d experiments using Elmer/ICE, *The Cryosphere*, 10, 307–312, 2016.
- Gladstone, R. M., Lee, V., Vieli, A., and Payne, A. J.: Grounding line migration in an adaptive mesh ice sheet model, *J. Geophys. Res.*, 115,  
F04014, 2010a.
- Gladstone, R. M., Payne, A. J., and Cornford, S. L.: Parameterising the grounding line in flow-line ice sheet models, *Cryosphere*, 4, 605–619,  
2010b.
- 535 Gladstone, R. M., Warner, R. C., Galton-Fenzi, B. K., Gagliardini, O., Zwinger, T., and Greve, R.: Marine ice sheet model performance  
depends on basal sliding physics and sub-shelf melting, *Cryosphere*, 11, 319–329, 2017.
- Gong, Y., Zwinger, T., Cornford, S., Gladstone, R., Schäfer, M., and Moore, J. C.: Importance of basal boundary conditions in transient  
simulations: case study of a surging marine-terminating glacier on Austfonna, Svalbard, *J. Glaciol.*, 63, 106–117, 2017.
- Hanna, E., Navarro, F. J., Pattyn, F., Domingues, C. M., Fettweis, X., Ivins, E. R., Nicholls, R. J., Ritz, C., Smith, B., Tulaczyk, S., White-  
540 house, P. L., and Zwally, H. J.: Ice-sheet mass balance and climate change, *Nature*, 498, 51–59, 2013.
- Helanow, C. and Ahlkrone, J.: Stabilized equal low-order finite elements in ice sheet modeling—accuracy and robustness, *Computational  
Geosciences*, 22, 951–974, 2018.
- Hutter, K.: *Theoretical Glaciology*, D. Reidel Publishing Company, Terra Scientific Publishing Company, Dordrecht, 1983.
- Jouvet, G. and Rappaz, J.: Analysis and finite element approximation of a nonlinear stationary Stokes problem arising in glaciology, *Adv.  
545 Numer. Anal.*, 2011, 164–181, 2011.
- Kingslake, J., Scherer, R. P., Albrecht, T., Coenen, J., Powell, R. D., Reese, R., Stansell, N. D., Tulaczyk, S., Wearing, M. G., and Whitehouse,  
P. L.: Extensive retreat and re-advance of the West Antarctic ice sheet during the Holocene, *Nature*, 558, 430–434, 2018.
- Konrad, H., Shepherd, A., Gilbert, L., Hogg, A. E., McMillan, M., Muir, A., and Slater, T.: Net retreat of Antarctic glacier grounding line,  
*Nat. Geosci.*, 11, 258–262, 2018.
- 550 Larour, E., Seroussi, H., Adhikari, S., Ivins, E., Caron, L., Morlighem, M., and Schlegel, N.: Slowdown in Antarctic mass loss from solid  
Earth and sea-level feedbacks, *Science*, 364, eaav7908, 2019.
- Leguy, G. R., Asay-Davis, X. S., and Lipscomb, W. H.: Parameterization of basal friction near grounding lines in a one-dimensional ice sheet  
model, *Cryosphere*, 8, 1239–1259, 2014.
- Leng, W., Ju, L., Gunzburger, M., Price, S., and Ringler, T.: A parallel high-order accurate finite element nonlinear Stokes ice sheet model  
555 and benchmark experiments, *J. Geophys. Res.: Earth Surf.*, 117, 2156–2202, 2012.
- MacAyeal, D. R.: Large-scale ice flow over a viscous basal sediment: Theory and application to Ice Stream B, Antarctica., *J. Geophys. Res.*,  
94, 4071–4078, 1989.
- Martin, N. and Monnier, J.: Four-field finite element solver and sensitivities for quasi-Newtonian flows, *SIAM Journal on Scientific Com-  
puting*, 36, S132–S165, 2014.
- 560 Nitsche, J.: Über ein Variationsprinzip zur Lösung von Dirichlet-Problemen bei Verwendung von Teilräumen, die keinen Randbedingungen  
unterworfen sind, *Abh. Math. Semin., University of Hamburg, Germany*, 36, 9–15, 1971.



- Nowicki, S. M. J. and Wingham, D. J.: Conditions for a steady ice sheet–ice shelf junction, *Earth Plan. Sci. Lett.*, 265, 246–255, 2008.
- Pattyn, F. and Durand, G.: Why marine ice sheet model predictions may diverge in estimating future sea level rise, *Geophys. Res. Lett.*, 40, 4316–4320, 2013.
- 565 Pattyn, F., Schoof, C., Perichon, L., Hindmarsh, R. C. A., Bueller, E., de Fleurian, B., Durand, G., Gagliardini, O., Gladstone, R., Goldberg, D., Gudmundsson, G. H., Huybrechts, P., Lee, V., Nick, F. M., Payne, A. J., Pollard, D., Rybak, O., Saito, F., and Vieli, A.: Results of the Marine Ice Sheet Model Intercomparison Project, MISIMP, *Cryosphere*, 6, 573–588, 2012.
- Pattyn, F., Perichon, L., Durand, G., Favier, L., Gagliardini, O., Hindmarsh, R. C. A., Zwinger, T., Albrecht, T., Cornford, S., Docquier, D., Fürst, J. J., Goldberg, D., Gudmundsson, G. H., Humbert, A., Hütten, M., Jouvét, G., Kleiner, T., Larour, E., Martin, D., Morlighem, M.,  
570 Payne, A. J., Pollard, D., Rückamp, M., Rybak, O., Seroussi, H., Thoma, M., and Wilkens, N.: Grounding-line migration in plan-view marine ice-sheet models: results of the ice2sea MISIMP3d intercomparison, *J. Glaciol.*, 59, 410–422, 2013.
- Reusken, A., Xu, X., and Zhang, L.: Finite element methods for a class of continuum models for immiscible flows with moving contact lines, *Int. J. Numer. Meth. Fluids*, 84, 268–291, 2017.
- Schoof, C.: Ice sheet grounding line dynamics: Steady states, stability and hysteresis, *J. Geophys. Res.: Earth Surf.*, 112, F03S28, 2007.
- 575 Schoof, C.: Marine ice sheet dynamics. Part 2. A Stokes flow contact problem, *J. Fluid Mech.*, 679, 122–155, 2011.
- Schoof, C. and Hindmarsh, R.: Thin-Film Flows with Wall Slip: An Asymptotic Analysis of Higher Order Glacier Flow Models, *Quart. J. Mech. Appl. Math.*, 63, 73–114, 2010.
- Seroussi, H., Morlighem, M., Larour, E., Rignot, E., and Khazendar, A.: Hydrostatic grounding line parameterization in ice sheet models, *Cryosphere*, 8, 2075–2087, 2014.
- 580 Stokes, C. R., Tarasov, L., Blomdin, R., Cronin, T. M., Fisher, T. G., Gyllencreutz, R., Hättestrand, C., Heyman, J., Hindmarsh, R. C. A., Hughes, A. L. C., Jakobsson, M., Kirchner, N., Livingstone, S. J., Margold, M., Murton, J. B., Noormets, R., Peltier, W. R., Peteet, D. M., Piper, D. J. W., Preusser, F., Renssen, H., Roberts, D. H., Roche, D. M., Saint-Ange, F., and Stroeve, A. P.: On the reconstruction of palaeo-ice sheets: Recent advances and future challenges, *Quat. Sci. Rev.*, 125, 15–49, 2015.
- Urquiza, J. M., Garon, A., and Farinas, M.-I.: Weak imposition of the slip boundary condition on curved boundaries for Stokes flow, *J. Comput. Phys.*, 256, 748–767, 2014.
- 585 Weis, M., Greve, R., and Hutter, K.: Theory of shallow ice shelves, *Continuum Mech. Thermodyn.*, 11, 15–50, 1999.
- Wilchinsky, A. V. and Chugunov, V. A.: Ice-stream–ice-shelf transition: theoretical analysis of two-dimensional flow, *Ann. Glaciology*, 30, 153–162, 2000.
- Zhang, T., Price, S., Ju, L., Lei, W., Brondex, J., Durand, G., and Gagliardini, O.: A comparison of two Stokes ice sheet models applied to  
590 the Marine Ice Sheet Model Intercomparison Project for plan view models, *Cryosphere*, 11, 179–190, 2017.
